# Supplementary material
Source: publisher figshare collection journal article supplement (https://acs.figshare.com/ndownloader/files/23458007)
Supplement: Supplementary file 2 [file 23458007]

# Permission Request Form for Use of *Individual and/or Group Photos* in *ACS LiveSlides* from Copyright Owners/Publishers/Photographers Other Than ACS

Date: 06/24/20

To: Chungta-Han

Publisher's/Copyright Owner's Contact Information

chungtahan@ucsb.edu

Publisher's/Copyright Owner's Email Address

From: Yuanxin Li

Your Name and Complete Mailing Address

Chemistry and Biochemistry,  
UCSB

Your Phone Number Including Country and City Codes

+1-8052801054

Your Email Address

yli05@ucsb.edu

Your Specific Deadline Date

I am preparing an *ACS LiveSlides* entitled:

Crossover from a Solid Effect to Thermal Mixing 1H Dynamic Nuclear Polarization with Trityl-OX063

to appear with

Crossover from a Solid Effect to Thermal Mixing 1H Dynamic Nuclear Polarization with Trityl-OX063. DOI: 10.1021/acs.jpcclett.0c00830

Title of ACS Publication and DOI

which is published by the American Chemical Society, a not-for-profit membership society and a STM signatory.

I would appreciate your permission to use the following material in all formats including but not limited to print, microform, electronic, and/or CD-ROM from the following reference:

Individual Photographs of the Following Individuals:

Songji Han, Yuanxin Li, Tarnuma Tabassum, Asif Egnbal

Collective Photograph (s) representing the following groups:

Yuanxin Li

If you, the photographer, have a required **credit line**, please include it below:

For your convenience, you may sign and date the bottom of this letter to indicate your agreement. Please return this form to me at the above email address, by the above **deadline date** (if given above). Thank you.

Agreed:

Chungta Han

Publisher's/Copyright Owner's Signature or Stamp

Date:

06/24/2020

Date

Submit completed and signed form with your signed *ACS LiveSlides* Video Release.

7/25/16
