# Supplementary material
Source: publisher figshare collection journal article supplement (https://acs.figshare.com/ndownloader/files/23458007)
Supplement: Supplementary file 3 [file 23458007]

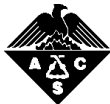

# AMERICAN CHEMICAL SOCIETY

## MODEL RELEASE FORM for ACS LiveSlides (Person in Photograph)

This form cannot be altered. For questions, please contact [ACSPubsMultimedia@acs.org](mailto:ACSPubsMultimedia@acs.org)

### Requesting Permission:

Date: 06/24/20

To: Asif Eqbal

asifeqbal3@gmail.com

Return to: Yuanxin Li

yli05@ucsb.edu

I am preparing material for  
Crossover from a Solid Effect to Thermal Mixing 1H Dynamic Nuclear Polarization  
with Trityl-OX063

(title of ACS LifeSlide)

to be published by the American Chemical Society, a not-for-profit membership society.

I would like your permission to include the enclosed photograph(s) in which you appear. To indicate your permission, please sign and date the statement below and return this form to me.

I appreciate your prompt response.

Signed: Yuanxin Li

### Grant of Permission:

I hereby grant to the American Chemical Society royalty-free permission, including nonexclusive world rights in all languages, to reproduce in all formats including but not limited to print, microform, electronic, and/or CD-ROM, to reproduce and include my likeness as shown in the attached photocopy(ies) of photograph(s) for the above-mentioned publication.

Agree to and accepted:

Signature Asif Eqbal Date: 6/25/2020

Check one of the blanks:

☒ I am the person in the photo

☐ I am the authorized agent for the person in the photo (for group photographs, one person, in the photograph, needs to sign on behalf of the group)

Submit completed and signed form with your signed ACS Journals LifeSlides Video Release.

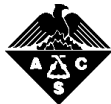

# AMERICAN CHEMICAL SOCIETY

## MODEL RELEASE FORM for ACS LiveSlides (Person in Photograph)

This form cannot be altered. For questions, please contact [ACSPubsMultimedia@acs.org](mailto:ACSPubsMultimedia@acs.org)

### Requesting Permission:

Date: 06/24/20

To: Song Han

songihan@ucsb.edu

Return to: Yuanxin Li

yli05@ucsb.edu

I am preparing material for  
Crossover from a Solid Effect to Thermal Mixing 1H Dynamic Nuclear Polarization  
with Trityl-OX063

(title of ACS LifeSlide)

to be published by the American Chemical Society, a not-for-profit membership society.

I would like your permission to include the enclosed photograph(s) in which you appear. To indicate your permission, please sign and date the statement below and return this form to me.

I appreciate your prompt response.

Signed: Yuanxin Li

### Grant of Permission:

I hereby grant to the American Chemical Society royalty-free permission, including nonexclusive world rights in all languages, to reproduce in all formats including but not limited to print, microform, electronic, and/or CD-ROM, to reproduce and include my likeness as shown in the attached photocopy(ies) of photograph(s) for the above-mentioned publication.

Agree to and accepted:

Signature Song Han Date: 6/24/2020

Check one of the blanks:

☒ I am the person in the photo

☐ I am the authorized agent for the person in the photo (for group photographs, one person, in the photograph, needs to sign on behalf of the group)

Submit completed and signed form with your signed ACS Journals LifeSlides Video Release.



## AMERICAN CHEMICAL SOCIETY

### MODEL RELEASE FORM for ACS LiveSlides (Person in Photograph)

This form cannot be altered. For questions, please contact [ACSPubsMultimedia@acs.org](mailto:ACSPubsMultimedia@acs.org)

#### Requesting Permission:

Date: 06/24/20

To: Tarnuma Tabassum  
ttabassum@ucsb.edu

Return to: Yuanxin Li  
yli05@ucsb.edu

I am preparing material for  
Crossover from a Solid Effect to Thermal Mixing 1H Dynamic Nuclear Polarization  
with Trityl-OX063

(title of ACS LifeSlide)

to be published by the American Chemical Society, a not-for-profit membership society.

I would like your permission to include the enclosed photograph(s) in which you appear. To indicate your permission, please sign and date the statement below and return this form to me.

I appreciate your prompt response.

Signed: Yuanxin Li

#### Grant of Permission:

I hereby grant to the American Chemical Society royalty-free permission, including nonexclusive world rights in all languages, to reproduce in all formats including but not limited to print, microform, electronic, and/or CD-ROM, to reproduce and include my likeness as shown in the attached photocopy(ies) of photograph(s) for the above-mentioned publication.

Agree to and accepted:

Signature Tarnuma Tabassum Date: 6/24/2020  
DocuSigned by: 74618C7EF0074AA...

Check one of the blanks:

☒ I am the person in the photo

☐ I am the authorized agent for the person in the photo (for group photographs, one person, in the photograph, needs to sign on behalf of the group)

Submit completed and signed form with your signed ACS Journals LifeSlides Video Release.



## AMERICAN CHEMICAL SOCIETY

### MODEL RELEASE FORM for *ACS LiveSlides* (Person in Photograph)

This form cannot be altered. For questions, please contact [ACSPubsMultimedia@acs.org](mailto:ACSPubsMultimedia@acs.org)

#### Requesting Permission:

Date: 06/24/20

To: Yuanxin Li

yli05@ucsb.edu

Return to: Yuanxin Li

yli05@ucsb.edu

I am preparing material for  
Crossover from a Solid Effect to Thermal Mixing 1H Dynamic Nuclear Polarization  
with Trityl-OX063

(title of ACS LifeSlide)

to be published by the American Chemical Society, a not-for-profit membership society.

I would like your permission to include the enclosed photograph(s) in which you appear. To indicate your permission, please sign and date the statement below and return this form to me.

I appreciate your prompt response.

Signed: Yuanxin Li

#### Grant of Permission:

I hereby grant to the American Chemical Society royalty-free permission, including nonexclusive world rights in all languages, to reproduce in all formats including but not limited to print, microform, electronic, and/or CD-ROM, to reproduce and include my likeness as shown in the attached photocopy(ies) of photograph(s) for the above-mentioned publication.

Agree to and accepted:

Signature Yuanxin Li Date: 06/25/20

Check one of the blanks:

☒ I am the person in the photo

☐ I am the authorized agent for the person in the photo (for group photographs, one person, in the photograph, needs to sign on behalf of the group)

Submit completed and signed form with your signed ACS Journals LifeSlides Video Release.



## AMERICAN CHEMICAL SOCIETY

### MODEL RELEASE FORM for *ACS LiveSlides* (Person in Photograph)

This form cannot be altered. For questions, please contact [ACSPubsMultimedia@acs.org](mailto:ACSPubsMultimedia@acs.org)

#### Requesting Permission:

Date: 06/24/20

To: Yuanxin Li  
yli05@ucsb.edu

Return to: Yuanxin Li  
yli05@ucsb.edu

I am preparing material for  
Crossover from a Solid Effect to Thermal Mixing 1H Dynamic Nuclear Polarization  
with Trityl-OX063

(title of ACS LifeSlide)

to be published by the American Chemical Society, a not-for-profit membership society.

I would like your permission to include the enclosed photograph(s) in which you appear. To indicate your permission, please sign and date the statement below and return this form to me.

I appreciate your prompt response.

Signed: Yuanxin Li

#### Grant of Permission:

I hereby grant to the American Chemical Society royalty-free permission, including nonexclusive world rights in all languages, to reproduce in all formats including but not limited to print, microform, electronic, and/or CD-ROM, to reproduce and include my likeness as shown in the attached photocopy(ies) of photograph(s) for the above-mentioned publication.

Agree to and accepted:

Signature Yuanxin Li Date: 06/25/20

Check one of the blanks:

☐ I am the person in the photo

☒ I am the authorized agent for the person in the photo (for group photographs, one person, in the photograph, needs to sign on behalf of the group)

Submit completed and signed form with your signed ACS Journals LifeSlides Video Release.
