# Supplementary material
Source: publisher figshare collection journal article supplement (https://acs.figshare.com/ndownloader/files/23458007)
Supplement: Supplementary file 4 [file 23458007]

Archive with 5 entries (5 files):
- info.xml
- jz0c00830_high_quality.mp4
- 1016_Permission_From_Photographer.pdf
- 1700_Model_Release_Person_in_Photograph.pdf
- jz0c00830.pdf
