# Supplementary material
Source: publisher figshare collection journal article supplement (https://acs.figshare.com/ndownloader/files/23458007)
Supplement: Supplementary file 4 [file 23458007 › info.xml]

<presentation>
	<article>
		<title>Crossover from Solid Effect to Thermal Mixing 1H Dynamic Nuclear Polarization in Trityl-OX063</title>
		<doi>10.1021/acs.jpclett.0c00830</doi>
		<copyright>American Chemical Society</copyright>
		<narrator>Songi Han, Asif Equbal, Tarnuma Tabassum, Yuanxin Li</narrator>
		<contact>Songi Han</contact>
		<contact-email>songihan@ucsb.edu</contact-email>
		<author-list>
			<author>Songi Han</author>
		</author-list>
	</article>
	<slides height-width-ratio=".75">
		<slide audio-time="62">
			<subtitle/>
		</slide>
		<slide audio-time="145">
			<subtitle/>
		</slide>
		<slide audio-time="92">
			<subtitle/>
		</slide>
		<slide audio-time="101">
			<subtitle/>
		</slide>
		<slide audio-time="71">
			<subtitle/>
		</slide>
		<slide audio-time="51">
			<subtitle/>
		</slide>
		<slide audio-time="71">
			<subtitle/>
		</slide>
		<slide audio-time="124">
			<subtitle/>
		</slide>
	</slides>
	<audio duration="717"/>
</presentation>
